# Supplementary material for: Histone deacetylase inhibition facilitates massed pattern-induced synaptic plasticity and memory
Source: PubMed Central journal article supplement — Learn Mem. 2015 Oct;22(10):514–8. doi: 10.1101/lm.039289.115 (PMC4579358; doi:10.1101/lm.039289.115), 2015-10

# Pandey et al\_Supplementary Figure 1

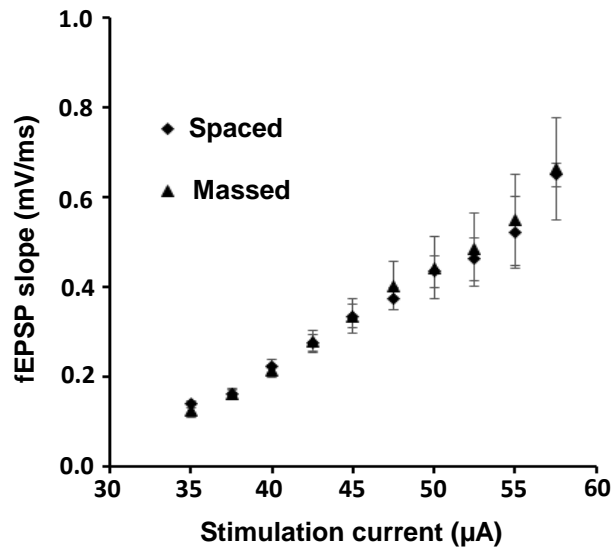

# Pandey et al\_Supplementary Figure 2

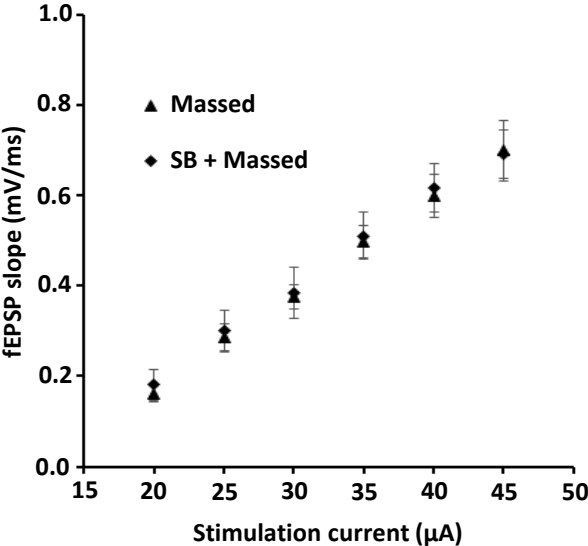

# Pandey et al\_Supplementary Figure 3

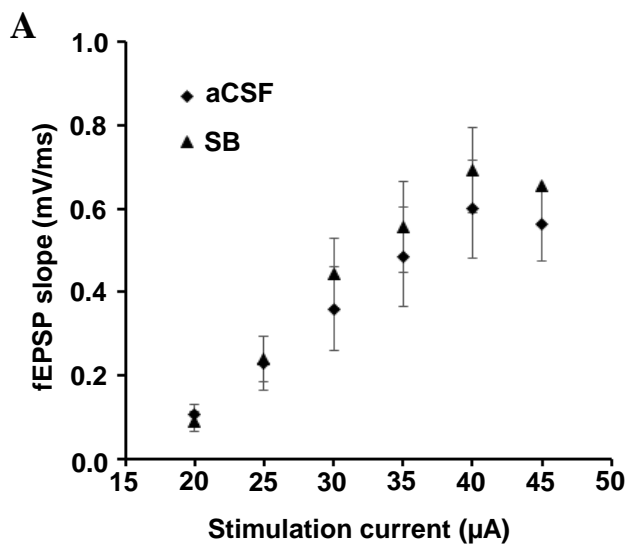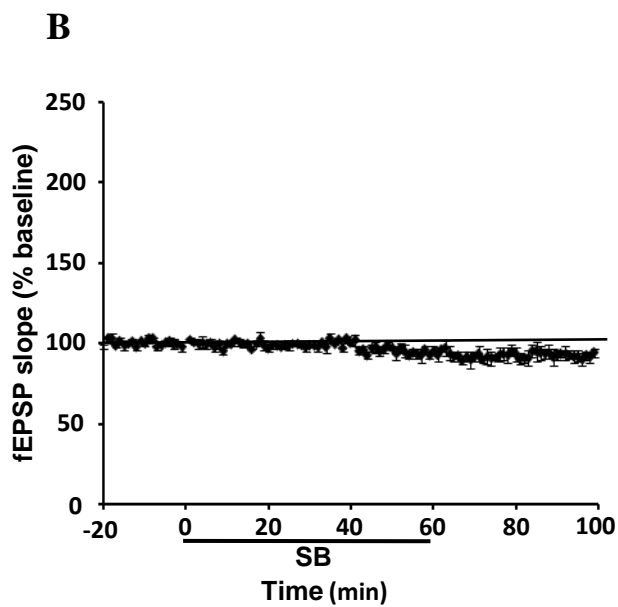

# Pandey et al\_Supplementary Figure 4

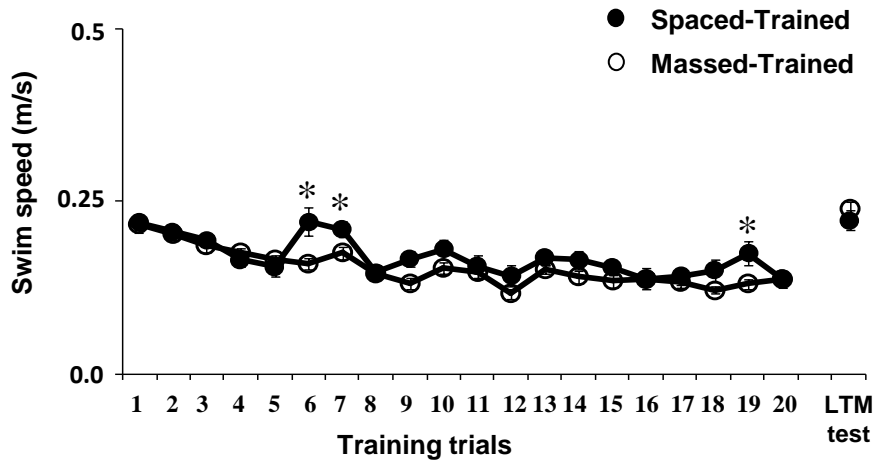

# Pandey et al\_Supplementary Figure 5

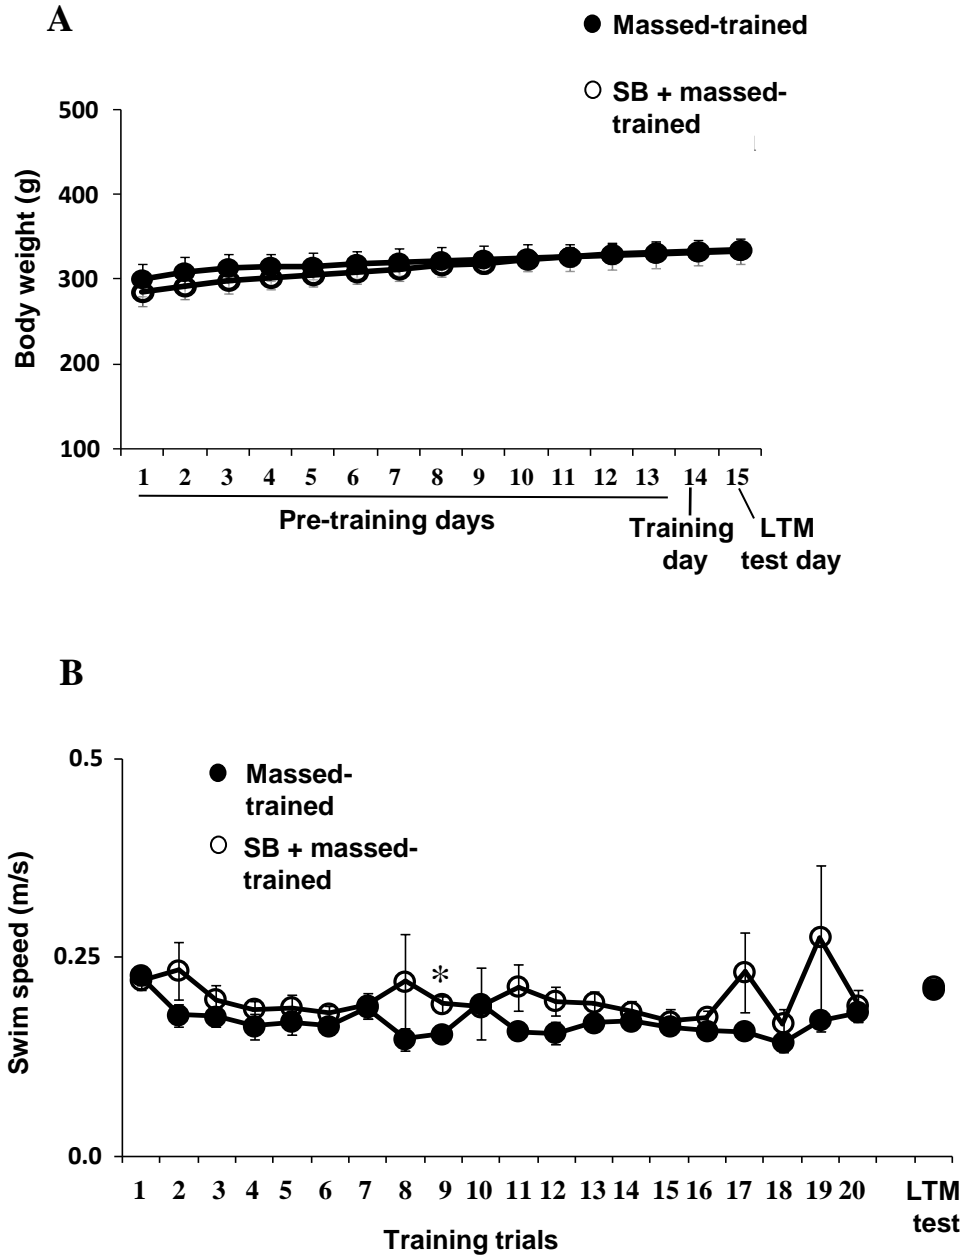

Supplement: supp_22.10.514_SuppFigures.pdf [file supp_22.10.514_SuppFigures.pdf]
